# Supplementary material for: Cross‐Talking Pathways of Forkhead Box O1 (FOXO1) Are Involved in the Pathogenesis of Alzheimer’s Disease and Huntington’s Disease
Source: Hindawi journal article supplement (doi:10.1155/2022/7619255), 2022-01-01
Supplement: f1 [file 7619255.f1.pdf]

| Sample     | Group | Age | Gender | FOXO1        |
|------------|-------|-----|--------|--------------|
| GSM1423780 | AD    | 67  | Female | -0.127339859 |
| GSM1423781 | AD    | 88  | Male   | 0.008578354  |
| GSM1423782 | AD    | 62  | Male   | -0.213740803 |
| GSM1423783 | AD    | 90  | Female | 0.02778929   |
| GSM1423784 | AD    | 90  | Female | -0.148348412 |
| GSM1423785 | AD    | 95  | Female | 0.121553438  |
| GSM1423786 | AD    | 77  | Female | 0.135600124  |
| GSM1423787 | AD    | 100 | Female | 0.169075128  |
| GSM1423788 | AD    | 72  | Male   | 0.056688476  |
| GSM1423789 | AD    | 64  | Female | 0.233437375  |
| GSM1423790 | AD    | 89  | Female | 0.075266074  |
| GSM1423791 | AD    | 80  | Female | 0.244011632  |
| GSM1423792 | AD    | 61  | Female | 0.188573266  |
| GSM1423793 | AD    | 93  | Male   | 0.117933579  |
| GSM1423794 | AD    | 81  | Female | 0.177987175  |
| GSM1423795 | AD    | 89  | Male   | 0.239653338  |
| GSM1423796 | AD    | 81  | Male   | 0.09964405   |
| GSM1423797 | AD    | 85  | Female | 0.023769824  |
| GSM1423798 | AD    | 79  | Male   | 0.219616217  |
| GSM1423799 | AD    | 77  | Female | 0.223774587  |
| GSM1423800 | AD    | 91  | Female | 0.219672672  |
| GSM1423801 | AD    | 87  | Male   | -0.009824949 |
| GSM1423802 | AD    | 77  | Female | 0.171551504  |
| GSM1423803 | AD    | 77  | Male   | 0.075812902  |
| GSM1423804 | AD    | 75  | Female | 0.102924898  |
| GSM1423805 | AD    | 76  | Female | -0.056117952 |
| GSM1423806 | AD    | 84  | Female | 0.254961493  |
| GSM1423807 | AD    | 65  | Male   | 0.26581474   |
| GSM1423808 | AD    | 66  | Female | 0.201747758  |
| GSM1423810 | AD    | 77  | Male   | 0.260863437  |
| GSM1423811 | AD    | 61  | Male   | -0.030850342 |
| GSM1423812 | AD    | 79  | Male   | 0.159469368  |
| GSM1423813 | AD    | 85  | Male   | 0.02055705   |
| GSM1423814 | AD    | 79  | Female | -0.037647505 |
| GSM1423815 | AD    | 89  | Female | 0.04348391   |
| GSM1423816 | AD    | 74  | Male   | 0.019230994  |
| GSM1423817 | AD    | 89  | Male   | 0.043696449  |
| GSM1423818 | AD    | 85  | Female | 0.097162171  |
| GSM1423819 | AD    | 67  | Female | 0.156966886  |

|            |    |           |              |
|------------|----|-----------|--------------|
| GSM1423820 | AD | 90 Female | 0.350433884  |
| GSM1423821 | AD | 92 Female | 0.237851488  |
| GSM1423822 | AD | 76 Female | -0.141427159 |
| GSM1423823 | AD | 84 Female | 0.208835584  |
| GSM1423824 | AD | 83 Female | 0.223576216  |
| GSM1423825 | AD | 75 Female | -0.023517942 |
| GSM1423826 | AD | 82 Male   | 0.185761079  |
| GSM1423827 | AD | 87 Female | 0.145846411  |
| GSM1423828 | AD | 92 Male   | 0.187246851  |
| GSM1423829 | AD | 74 Female | 0.084314037  |
| GSM1423830 | AD | 83 Female | -0.249455532 |
| GSM1423831 | AD | 77 Male   | 0.086590631  |
| GSM1423832 | AD | 68 Male   | 0.211740839  |
| GSM1423833 | AD | 87 Male   | 0.014694986  |
| GSM1423834 | AD | 83 Female | 0.200568365  |
| GSM1423835 | AD | 77 Male   | 0.14029233   |
| GSM1423836 | AD | 78 Male   | -0.019956713 |
| GSM1423837 | AD | 85 Male   | 0.189828196  |
| GSM1423838 | AD | 67 Female | 0.029065464  |
| GSM1423839 | AD | 89 Male   | 0.169413995  |
| GSM1423840 | AD | 87 Female | 0.166690484  |
| GSM1423841 | AD | 74 Male   | 0.018044303  |
| GSM1423842 | AD | 69 Female | 0.218341327  |
| GSM1423843 | AD | 73 Male   | 0.041830718  |
| GSM1423844 | AD | 83 Male   | 0.12163156   |
| GSM1423845 | AD | 62 Female | 0.107619731  |
| GSM1423846 | AD | 83 Male   | 0.120020606  |
| GSM1423847 | AD | 75 Male   | 0.04321115   |
| GSM1423848 | AD | 82 Male   | 0.102852321  |
| GSM1423849 | AD | 83 Female | 0.039763498  |
| GSM1423850 | AD | 80 Male   | 0.21324122   |
| GSM1423851 | AD | 92 Female | 0.281694619  |
| GSM1423852 | AD | 81 Female | -0.028247677 |
| GSM1423853 | AD | 85 Female | 0.293908996  |
| GSM1423854 | AD | 68 Female | 0.155308442  |
| GSM1423855 | AD | 81 Female | 0.190467825  |
| GSM1423856 | AD | 84 Female | 0.237550256  |
| GSM1423857 | AD | 73 Male   | 0.322866044  |
| GSM1423858 | AD | 98 Female | 0.303965937  |
| GSM1423859 | AD | 82 Female | 0.29007361   |

|            |    |           |              |
|------------|----|-----------|--------------|
| GSM1423860 | AD | 86 Male   | 0.290467973  |
| GSM1423861 | AD | 71 Male   | 0.144564401  |
| GSM1423862 | AD | 86 Female | -0.051368426 |
| GSM1423863 | AD | 80 Female | 0.142642207  |
| GSM1423864 | AD | 77 Male   | 0.072870784  |
| GSM1423865 | AD | 83 Female | 0.256690501  |
| GSM1423866 | AD | 88 Male   | 0.063122933  |
| GSM1423867 | AD | 64 Male   | -0.074329775 |
| GSM1423868 | AD | 70 Male   | 0.244503178  |
| GSM1423869 | AD | 82 Female | 0.127803454  |
| GSM1423870 | AD | 67 Female | 0.198053173  |
| GSM1423871 | AD | 80 Male   | 0.147103939  |
| GSM1423872 | AD | 80 Female | 0.314528155  |
| GSM1423873 | AD | 85 Female | 0.170197616  |
| GSM1423874 | AD | 86 Female | 0.190538912  |
| GSM1423875 | AD | 85 Male   | 0.081713716  |
| GSM1423876 | AD | 88 Male   | -0.014082492 |
| GSM1423877 | AD | 89 Male   | 0.19482432   |
| GSM1423878 | AD | 81 Male   | 0.133675088  |
| GSM1423879 | AD | 91 Female | 0.243281068  |
| GSM1423880 | AD | 89 Female | -0.018537024 |
| GSM1423881 | AD | 76 Female | -0.042481098 |
| GSM1423882 | AD | 90 Female | 0.031733024  |
| GSM1423883 | AD | 87 Female | 0.245027471  |
| GSM1423884 | AD | 73 Male   | -0.169704931 |
| GSM1423885 | AD | 77 Male   | 0.285082557  |
| GSM1423886 | AD | 84 Female | 0.122352072  |
| GSM1423887 | AD | 87 Male   | 0.129111778  |
| GSM1423888 | AD | 78 Male   | 0.243923154  |
| GSM1423889 | AD | 73 Male   | 0.072315391  |
| GSM1423890 | AD | 71 Male   | 0.314735561  |
| GSM1423891 | AD | 93 Female | 0.310496269  |
| GSM1423892 | AD | 91 Female | 0.13671242   |
| GSM1423893 | AD | 87 Female | -0.069915513 |
| GSM1423894 | AD | 95 Female | 0.152960884  |
| GSM1423895 | AD | 82 Male   | 0.24865508   |
| GSM1423896 | AD | 72 Male   | 0.253804709  |
| GSM1423897 | AD | 80 Male   | 0.332973326  |
| GSM1423898 | AD | 88 Female | 0.301390801  |
| GSM1423899 | AD | 91 Female | 0.09737448   |

|            |    |           |              |
|------------|----|-----------|--------------|
| GSM1423900 | AD | 94 Female | 0.190770814  |
| GSM1423901 | AD | 84 Female | 0.071624608  |
| GSM1423902 | AD | 80 Female | -0.111991673 |
| GSM1423903 | AD | 80 Female | 0.212130355  |
| GSM1423904 | AD | 86 Male   | 0.180363701  |
| GSM1423905 | AD | 67 Male   | -0.320077098 |
| GSM1423906 | AD | 73 Male   | 0.141471526  |
| GSM1423907 | AD | 86 Female | 0.162116341  |
| GSM1423908 | AD | 94 Female | 0.019338671  |
| GSM1423909 | AD | 85 Male   | 0.067162981  |
| GSM1423910 | AD | 86 Female | 0.171236263  |
| GSM1423911 | AD | 78 Female | 0.319137294  |
| GSM1423912 | AD | 61 Male   | 0.142647489  |
| GSM1423913 | AD | 89 Female | 0.102370121  |
| GSM1423914 | AD | 74 Female | 0.123701939  |
| GSM1423915 | AD | 86 Female | 0.111989343  |
| GSM1423916 | AD | 73 Male   | 0.253625663  |
| GSM1423918 | AD | 73 Female | 0.119497948  |
| GSM1423919 | AD | 79 Male   | 0.122006106  |
| GSM1423920 | AD | 84 Female | -0.076250411 |
| GSM1423921 | AD | 83 Female | 0.238158771  |
| GSM1423922 | AD | 75 Female | 0.165420482  |
| GSM1423923 | AD | 82 Male   | 0.136220481  |
| GSM1423924 | AD | 86 Male   | 0.184810802  |
| GSM1423925 | AD | 75 Male   | 0.012366856  |
| GSM1423927 | AD | 87 Female | 0.227183867  |
| GSM1423928 | AD | 75 Female | 0.18677715   |
| GSM1423929 | AD | 75 Female | 0.24336305   |
| GSM1423930 | AD | 76 Male   | 0.280993023  |
| GSM1423931 | AD | 62 Female | 0.190614673  |
| GSM1423932 | AD | 67 Male   | 0.100790911  |
| GSM1423933 | AD | 82 Female | 0.198253287  |
| GSM1423934 | AD | 86 Male   | 0.231497456  |
| GSM1423935 | AD | 73 Male   | 0.151271679  |
| GSM1423936 | AD | 84 Female | 0.142197714  |
| GSM1423937 | AD | 65 Female | 0.129995356  |
| GSM1423938 | AD | 61 Female | 0.091193437  |
| GSM1423939 | AD | 76 Male   | 0.075225763  |
| GSM1423940 | AD | 98 Male   | 0.107904774  |
| GSM1423941 | AD | 72 Male   | 0.093736418  |

|            |    |           |              |
|------------|----|-----------|--------------|
| GSM1423942 | AD | 92 Male   | -0.025363611 |
| GSM1423943 | AD | 87 Male   | 0.055307769  |
| GSM1423944 | AD | 93 Female | 0.095841554  |
| GSM1423945 | AD | 71 Male   | 0.217991986  |
| GSM1423946 | AD | 87 Female | 0.229458519  |
| GSM1423947 | AD | 82 Male   | 0.043249022  |
| GSM1423948 | AD | 63 Male   | 0.08022658   |
| GSM1423949 | AD | 88 Female | 0.272885947  |
| GSM1423950 | AD | 77 Male   | -0.321193    |
| GSM1423951 | AD | 77 Male   | 0.167423907  |
| GSM1423952 | AD | 92 Female | 0.06882137   |
| GSM1423953 | AD | 93 Female | 0.181727258  |
| GSM1423954 | AD | 69 Female | 0.131513427  |
| GSM1423955 | AD | 89 Male   | 0.053332159  |
| GSM1423956 | AD | 91 Female | 0.146915541  |
| GSM1423957 | AD | 84 Female | 0.1130117    |
| GSM1423958 | AD | 86 Male   | 0.06968187   |
| GSM1423959 | AD | 89 Female | 0.152334108  |
| GSM1423960 | AD | 76 Female | -0.00264839  |
| GSM1423961 | AD | 78 Female | 0.172705063  |
| GSM1423962 | AD | 70 Female | 0.073334032  |
| GSM1423963 | AD | 90 Female | 0.072811622  |
| GSM1423964 | AD | 72 Female | 0.197114877  |
| GSM1423965 | AD | 63 Female | 0.025537315  |
| GSM1423966 | AD | 98 Male   | 0.070949258  |
| GSM1423967 | AD | 93 Male   | -0.048908009 |
| GSM1423968 | AD | 69 Male   | 0.020740281  |
| GSM1423969 | AD | 80 Female | 0.13076501   |
| GSM1423970 | AD | 79 Male   | -0.016863875 |
| GSM1423971 | AD | 91 Female | 0.122739812  |
| GSM1423972 | AD | 88 Female | 0.022292303  |
| GSM1423973 | AD | 95 Female | -0.017396135 |
| GSM1423974 | AD | 66 Female | 0.102661228  |
| GSM1423975 | AD | 85 Male   | 0.120080464  |
| GSM1423976 | AD | 84 Female | 0.017461646  |
| GSM1423977 | AD | 97 Female | 0.167977784  |
| GSM1423978 | AD | 84 Male   | 0.044045033  |
| GSM1423979 | AD | 84 Female | 0.251570955  |
| GSM1423980 | AD | 78 Female | -0.064463965 |
| GSM1423981 | AD | 88 Female | 0.132849953  |

|            |    |           |              |
|------------|----|-----------|--------------|
| GSM1423982 | AD | 89 Female | 0.112004601  |
| GSM1423983 | AD | 84 Female | 0.08775425   |
| GSM1423984 | AD | 84 Female | 0.235651094  |
| GSM1423985 | AD | 80 Male   | -0.08206429  |
| GSM1423986 | AD | 77 Male   | 0.168859428  |
| GSM1423987 | AD | 93 Female | -0.001155536 |
| GSM1423988 | AD | 88 Male   | 0.134728369  |
| GSM1423989 | AD | 78 Female | 0.250238609  |
| GSM1423990 | AD | 77 Female | 0.096570494  |
| GSM1423991 | AD | 87 Female | 0.17569025   |
| GSM1423992 | AD | 88 Female | 0.238704097  |
| GSM1423993 | AD | 84 Male   | -0.030322048 |
| GSM1423994 | AD | 80 Male   | 0.1289315    |
| GSM1423995 | AD | 83 Female | 0.177225713  |
| GSM1423996 | AD | 81 Female | 0.163909988  |
| GSM1423997 | AD | 83 Female | 0.097859999  |
| GSM1423998 | AD | 77 Female | 0.139736988  |
| GSM1423999 | AD | 81 Female | 0.116621497  |
| GSM1424000 | AD | 87 Male   | 0.040746336  |
| GSM1424001 | AD | 87 Female | 0.178682319  |
| GSM1424002 | AD | 85 Female | 0.216068408  |
| GSM1424003 | AD | 78 Male   | 0.138960932  |
| GSM1424004 | AD | 83 Female | 0.075283248  |
| GSM1424005 | AD | 87 Female | 0.096359994  |
| GSM1424006 | AD | 80 Female | 0.175856414  |
| GSM1424007 | AD | 92 Female | -0.006014661 |
| GSM1424008 | AD | 88 Female | 0.095290826  |
| GSM1424009 | AD | 73 Male   | 0.027553893  |
| GSM1424010 | AD | 72 Male   | -0.237171513 |
| GSM1424011 | AD | 94 Female | 0.112984986  |
| GSM1424012 | AD | 72 Male   | 0.109840894  |
| GSM1424013 | AD | 88 Female | 0.144370937  |
| GSM1424014 | AD | 87 Male   | 0.200984809  |
| GSM1424015 | AD | 73 Female | -0.068446221 |
| GSM1424016 | AD | 80 Female | 0.027762342  |
| GSM1424017 | AD | 92 Male   | 0.166594407  |
| GSM1424018 | AD | 91 Female | -0.085803115 |
| GSM1424019 | AD | 86 Female | 0.12560805   |
| GSM1424020 | AD | 87 Male   | 0.052618974  |
| GSM1424021 | AD | 90 Male   | 0.197222136  |

|            |    |           |              |
|------------|----|-----------|--------------|
| GSM1424022 | AD | 75 Male   | 0.228046926  |
| GSM1424023 | AD | 69 Female | 0.051061618  |
| GSM1424024 | AD | 85 Male   | 0.08455695   |
| GSM1424025 | AD | 79 Female | 0.116862037  |
| GSM1424026 | AD | 91 Female | 0.135281139  |
| GSM1424027 | AD | 91 Female | 0.093083172  |
| GSM1424028 | AD | 90 Female | 0.062241084  |
| GSM1424029 | AD | 64 Male   | -0.009499139 |
| GSM1424030 | AD | 72 Male   | 0.12545065   |
| GSM1424031 | AD | 84 Female | 0.048118946  |
| GSM1424032 | AD | 84 Female | 0.187977703  |
| GSM1424033 | AD | 86 Female | 0.06045243   |
| GSM1424034 | AD | 60 Female | 0.112738603  |
| GSM1424035 | AD | 79 Female | 0.196542169  |
| GSM1424036 | AD | 86 Female | 0.205095471  |
| GSM1424037 | AD | 80 Male   | 0.141389905  |
| GSM1424038 | AD | 78 Male   | 0.075217024  |
| GSM1424039 | AD | 82 Male   | 0.185306966  |
| GSM1424040 | AD | 78 Male   | 0.275436309  |
| GSM1424041 | AD | 87 Male   | 0.159702834  |
| GSM1424042 | AD | 80 Male   | 0.072351792  |
| GSM1424043 | AD | 90 Female | -0.034133691 |
| GSM1424045 | AD | 82 Male   | 0.040666173  |
| GSM1424046 | AD | 72 Male   | -0.145722265 |
| GSM1424047 | AD | 73 Female | 0.156682689  |
| GSM1424048 | AD | 80 Female | 0.162819851  |
| GSM1424049 | AD | 75 Male   | 0.212000911  |
| GSM1424050 | AD | 79 Female | 0.071988712  |
| GSM1424051 | AD | 79 Female | 0.085059383  |
| GSM1424052 | AD | 73 Male   | 0.140193578  |
| GSM1424053 | AD | 69 Male   | 0.23901719   |
| GSM1424054 | AD | 88 Female | -0.013421075 |
| GSM1424055 | AD | 72 Male   | 0.188821314  |
| GSM1424056 | AD | 78 Male   | 0.073121203  |
| GSM1424057 | AD | 72 Female | 0.104204829  |
| GSM1424058 | AD | 76 Female | 0.15261641   |
| GSM1424059 | AD | 87 Female | -0.045535061 |
| GSM1424060 | AD | 92 Female | 0.220052651  |
| GSM1424061 | AD | 80 Female | -9.80E-05    |
| GSM1424062 | AD | 86 Female | 0.048171555  |

|            |         |           |              |
|------------|---------|-----------|--------------|
| GSM1424063 | AD      | 98 Male   | -0.196729496 |
| GSM1424064 | AD      | 78 Male   | -0.213391383 |
| GSM1424065 | AD      | 84 Male   | -0.100494942 |
| GSM1424066 | AD      | 79 Male   | 0.057212673  |
| GSM1424067 | AD      | 83 Female | 0.023120103  |
| GSM1424068 | AD      | 85 Female | 0.004679372  |
| GSM1424069 | AD      | 89 Male   | -0.005647553 |
| GSM1424070 | AD      | 66 Male   | 0.082880861  |
| GSM1424071 | AD      | 71 Male   | 0.069735772  |
| GSM1424072 | AD      | 71 Male   | 0.101607878  |
| GSM1424073 | AD      | 65 Male   | 0.073743796  |
| GSM1424074 | AD      | 70 Male   | -0.011320364 |
| GSM1424075 | AD      | 78 Male   | -0.066793539 |
| GSM1424076 | AD      | 94 Female | 0.141249747  |
| GSM1424077 | AD      | 83 Female | 0.148136461  |
| GSM1424078 | AD      | 79 Female | 0.076920282  |
| GSM1424079 | AD      | 76 Male   | -0.020471719 |
| GSM1424081 | AD      | 87 Male   | 0.16553365   |
| GSM1424082 | AD      | 72 Male   | 0.07241021   |
| GSM1424083 | AD      | 80 Female | 0.040089405  |
| GSM1424084 | AD      | 89 Female | 0.039523344  |
| GSM1424085 | AD      | 79 Male   | 0.017427936  |
| GSM1424086 | AD      | 93 Female | -0.114621657 |
| GSM1424087 | AD      | 90 Female | 0.163530483  |
| GSM1424088 | AD      | 91 Male   | 0.131192434  |
| GSM1424089 | AD      | 72 Male   | 0.052681749  |
| GSM1424091 | Control | 64 Male   | -0.291859618 |
| GSM1424092 | Control | 95 Female | 0.061593475  |
| GSM1424095 | Control | 62 Female | 0.127110562  |
| GSM1424098 | Control | 67 Male   | -0.161681074 |
| GSM1424099 | Control | 60 Female | 0.077308611  |
| GSM1424100 | Control | 82 Male   | -0.014936192 |
| GSM1424104 | Control | 67 Male   | -0.136135089 |
| GSM1424106 | Control | 66 Male   | -0.194671337 |
| GSM1424109 | Control | 75 Female | 0.113483985  |
| GSM1424110 | Control | 68 Male   | -0.14117942  |
| GSM1424111 | Control | 60 Male   | -0.229667009 |
| GSM1424112 | Control | 61 Male   | -0.27003573  |
| GSM1424113 | Control | 74 Female | 0.089105366  |
| GSM1424114 | Control | 72 Male   | -0.020937186 |



|            |         |           |              |
|------------|---------|-----------|--------------|
| GSM1424115 | Control | 73 Male   | -0.096152301 |
| GSM1424118 | Control | 68 Male   | -0.274901076 |
| GSM1424119 | Control | 74 Female | 0.002633538  |
| GSM1424121 | Control | 69 Female | -0.170490077 |
| GSM1424122 | Control | 64 Male   | -0.265844104 |
| GSM1424125 | Control | 72 Male   | -0.147346981 |
| GSM1424127 | Control | 60 Female | -0.045862628 |
| GSM1424129 | Control | 72 Male   | 0.020521829  |
| GSM1424130 | Control | 74 Male   | -0.249149481 |
| GSM1424131 | Control | 66 Female | 0.047874981  |
| GSM1424132 | Control | 70 Male   | -0.035330489 |
| GSM1424135 | Control | 65 Male   | -0.437600442 |
| GSM1424136 | Control | 75 Female | -0.14914158  |
| GSM1424139 | Control | 61 Male   | -0.289631066 |
| GSM1424141 | Control | 62 Male   | -0.177480983 |
| GSM1424142 | Control | 65 Female | -0.023124179 |
| GSM1424144 | Control | 75 Male   | -0.324521384 |
| GSM1424145 | Control | 68 Male   | 0.094799658  |
| GSM1424146 | Control | 75 Male   | -0.098921721 |
| GSM1424148 | Control | 61 Male   | -0.293889446 |
| GSM1424149 | Control | 71 Male   | -0.009589788 |
| GSM1424150 | Control | 77 Male   | -0.18195658  |
| GSM1424152 | Control | 65 Female | 0.147971742  |
| GSM1424154 | Control | 106 Male  | 0.057684549  |
| GSM1424156 | Control | 60 Male   | -0.194525595 |
| GSM1424157 | Control | 60 Male   | -0.162533885 |
| GSM1424161 | Control | 72 Female | 0.074864608  |
| GSM1424163 | Control | 70 Male   | 0.013313631  |
| GSM1424165 | Control | 66 Male   | -0.132717449 |
| GSM1424166 | Control | 63 Female | -0.239886126 |
| GSM1424167 | Control | 73 Male   | 0.026881004  |
| GSM1424169 | Control | 74 Male   | 0.066428384  |
| GSM1424170 | Control | 71 Female | -0.116107422 |
| GSM1424172 | Control | 69 Female | 0.073893545  |
| GSM1424173 | Control | 78 Female | 0.039845633  |
| GSM1424174 | Control | 71 Male   | -0.190814234 |
| GSM1424175 | Control | 69 Male   | 0.045707409  |
| GSM1424176 | Control | 60 Male   | -0.395081976 |
| GSM1424177 | Control | 61 Male   | -0.420179496 |
| GSM1424178 | Control | 62 Male   | -0.148220038 |

|            |         |           |              |
|------------|---------|-----------|--------------|
| GSM1424184 | Control | 66 Male   | -0.214404353 |
| GSM1424185 | Control | 80 Male   | -0.041739851 |
| GSM1424187 | Control | 69 Male   | -0.222907216 |
| GSM1424189 | Control | 61 Male   | -0.283271672 |
| GSM1424190 | Control | 65 Female | -0.270978858 |
| GSM1424191 | Control | 60 Male   | -0.350075923 |
| GSM1424192 | Control | 72 Male   | -0.171303008 |
| GSM1424193 | Control | 63 Male   | -0.343416345 |
| GSM1424194 | Control | 76 Male   | 0.047719756  |
| GSM1424195 | Control | 68 Male   | -0.086169713 |
| GSM1424196 | Control | 69 Female | 0.041745012  |
| GSM1424197 | Control | 63 Male   | -0.20557554  |
| GSM1424198 | Control | 74 Male   | 0.043663614  |
| GSM1424200 | Control | 65 Male   | -0.086398823 |
| GSM1424201 | Control | 78 Female | -0.340760499 |
| GSM1424202 | Control | 74 Male   | -0.124355366 |
| GSM1424203 | Control | 61 Male   | -0.072776155 |
| GSM1424204 | Control | 62 Male   | -0.325830302 |
| GSM1424205 | Control | 63 Male   | -0.143140218 |
| GSM1424206 | Control | 77 Male   | -0.228766938 |
| GSM1424208 | Control | 65 Male   | 0.096581303  |
| GSM1424209 | Control | 64 Male   | 0.122569718  |
| GSM1424210 | Control | 66 Male   | 0.074365157  |
| GSM1424211 | Control | 86 Male   | 0.087973972  |
| GSM1424213 | Control | 82 Male   | 0.137866621  |
| GSM1424214 | Control | 71 Female | -0.02490422  |
| GSM1424215 | Control | 73 Male   | -0.014533231 |
| GSM1424216 | Control | 68 Female | -0.112768288 |
| GSM1424217 | Control | 75 Male   | 0.214404463  |
| GSM1424218 | Control | 73 Female | 0.029026281  |
| GSM1424219 | Control | 79 Male   | -0.143970581 |
| GSM1424220 | Control | 68 Male   | 0.086055209  |
| GSM1424222 | Control | 76 Male   | -0.118553575 |
| GSM1424225 | Control | 66 Male   | -0.259159212 |
| GSM1424226 | Control | 60 Male   | -0.32885048  |
| GSM1424227 | Control | 60 Male   | -0.099861835 |
| GSM1424231 | Control | 80 Male   | -0.240984584 |
| GSM1424232 | Control | 66 Male   | -0.055384946 |
| GSM1424235 | Control | 64 Male   | -0.057449043 |
| GSM1424238 | Control | 72 Male   | -0.24165137  |

|            |         |           |              |
|------------|---------|-----------|--------------|
| GSM1424241 | Control | 65 Male   | -0.20167461  |
| GSM1424243 | Control | 61 Male   | -0.24242857  |
| GSM1424244 | Control | 60 Female | 0.04839474   |
| GSM1424246 | Control | 62 Male   | -0.307839037 |
| GSM1424247 | HD      | 60 Female | 0.103017926  |
| GSM1424249 | HD      | 63 Male   | 0.025700283  |
| GSM1424250 | HD      | 81 Female | 0.002108223  |
| GSM1424252 | HD      | 78 Female | 0.013298491  |
| GSM1424254 | HD      | 75 Male   | -0.20818485  |
| GSM1424257 | HD      | 63 Male   | 0.200329423  |
| GSM1424260 | HD      | 73 Male   | 0.043870533  |
| GSM1424264 | HD      | 73 Male   | 0.131819307  |
| GSM1424265 | HD      | 60 Female | -0.020602841 |
| GSM1424266 | HD      | 70 Male   | 0.154014425  |
| GSM1424267 | HD      | 74 Male   | 0.196321131  |
| GSM1424268 | HD      | 68 Female | 0.098310527  |
| GSM1424269 | HD      | 74 Female | 0.044366245  |
| GSM1424271 | HD      | 68 Male   | 0.158205446  |
| GSM1424278 | HD      | 62 Male   | 0.036969277  |
| GSM1424283 | HD      | 74 Male   | 0.136894927  |
| GSM1424285 | HD      | 60 Male   | -0.024013253 |
| GSM1424287 | HD      | 74 Male   | -0.033693831 |
| GSM1424294 | HD      | 62 Male   | -0.040808121 |
| GSM1424295 | HD      | 83 Female | 0.134458117  |
| GSM1424297 | HD      | 64 Male   | 0.017398165  |
| GSM1424305 | HD      | 69 Female | 0.219117423  |
| GSM1424307 | HD      | 67 Female | 0.16724079   |
| GSM1424310 | HD      | 63 Male   | -0.018123663 |
| GSM1424311 | HD      | 67 Male   | 0.075796722  |
| GSM1424312 | HD      | 72 Female | -0.012994593 |
| GSM1424313 | HD      | 65 Female | 0.038212916  |
| GSM1424314 | HD      | 72 Female | 0.050152063  |
| GSM1424316 | HD      | 64 Male   | 0.10893011   |
| GSM1424317 | HD      | 64 Male   | -0.085254344 |
| GSM1424318 | HD      | 61 Male   | 0.037328992  |
| GSM1424325 | HD      | 77 Male   | 0.1054369    |
| GSM1424326 | HD      | 83 Female | 0.129739279  |
| GSM1424327 | HD      | 82 Female | 0.172250817  |
| GSM1424329 | HD      | 73 Female | 0.009746321  |
| GSM1424330 | HD      | 75 Female | -0.057236033 |

|            |    |           |              |
|------------|----|-----------|--------------|
| GSM1424331 | HD | 82 Male   | 0.200187482  |
| GSM1424332 | HD | 85 Female | 0.076283794  |
| GSM1424333 | HD | 60 Male   | -0.116646812 |
| GSM1424336 | HD | 68 Female | 0.031670884  |
| GSM1424338 | HD | 80 Male   | 0.042552077  |
| GSM1424339 | HD | 84 Male   | 0.120992364  |
| GSM1424341 | HD | 73 Male   | 0.076312452  |
| GSM1424342 | HD | 81 Male   | 0.029863132  |
| GSM1424348 | HD | 62 Male   | 0.128291103  |
| GSM1424355 | HD | 66 Male   | -0.085963285 |
| GSM1424356 | HD | 64 Male   | 0.06119008   |
| GSM1424357 | HD | 75 Male   | -0.029811698 |
| GSM1424358 | HD | 60 Female | 0.267670464  |
| GSM1424359 | HD | 77 Female | 0.125739984  |
| GSM1424366 | HD | 70 Male   | 0.042749192  |
| GSM1424367 | HD | 67 Male   | 0.065218277  |
| GSM1424369 | HD | 66 Male   | -0.066481121 |
| GSM1424378 | HD | 74 Male   | 0.143528669  |
| GSM1424379 | HD | 65 Male   | 0.053823795  |
| GSM1424380 | HD | 66 Female | -0.091166761 |
| GSM1424384 | HD | 72 Male   | 0.041549321  |
| GSM1424388 | HD | 72 Male   | 0.02927982   |
| GSM1424392 | HD | 75 Male   | 0.135680994  |
| GSM1424393 | HD | 80 Female | -0.136433022 |
| GSM1424398 | HD | 69 Female | 0.047664394  |
| GSM1424399 | HD | 64 Male   | 0.124906614  |
